# Supplementary material for: Controlled synthesis of radiolabelled amine methacrylate water-soluble polymers with end-groups of varying hydrophobicity and studies of adsorption behaviour
Source: Royal Society of Chemistry journal article supplement (doi:10.1039/c1py00397f), 2011-11-04
Supplement: c1py00397f.pdf [file c1py00397f.pdf]

# Controlled synthesis of radiolabelled amine methacrylate water-soluble polymers with end-groups of varying hydrophobicity and studies of adsorption behaviour

Mark Long, David W Thornthwaite, Suzanne H. Rogers, Francis R Livens  
and Steve P Rannard

## Supporting Information

### Reagents and Suppliers

All reagents and solvents were purchased from the Sigma Aldrich Group unless otherwise stated. Prosafe liquid scintillation cocktail was purchased from Meridian Biotechnologies; PMMA GPC Standards were purchased from Polymer Laboratories; Partisil LK6DF Silica Gel 60A TLC Plates were purchased from BDH;  $^{14}\text{C}$  Methyl Iodide (98.4%) was purchased from Amersham Biosciences;  $^{14}\text{CH}_2$  Benzyl Alcohol (95%) was kindly supplied by Unilever. Buffer solutions were prepared using commercial Fixanal solutions

### Substrates

Filter paper: Whatman Filter Paper 1 (Cellulose based hydrophilic filter paper)  
Photographic Paper: Ilford Multigrade IV RC Delux Pearl Photo Paper (Medium Weight Polyethylene Hydrophobic Resin Coated Base)  
"Virgin" Hair: Provided by Unilever and has been previously untreated. Water contact angle  $103^\circ$  (pH1)

### Instrumentation Analysis and Sample Preparation

#### Nuclear Magnetic Resonance

All  $^1\text{H}$  and  $^{13}\text{C}$  NMR spectroscopy was conducted using a Bruker Advance DRX500 spectrometer. Sample preparation for  $^1\text{H}$  NMR involved approximately 2mg of the sample dissolved in 1ml of  $\text{CDCl}_3$ ;  $^{13}\text{C}$  NMR involved approximately 50mg of the sample dissolved in 1ml of  $\text{CDCl}_3$

#### Liquid Scintillation Counter

Analysis was conducted using a Packard Tri Carb 3100 TRC Liquid Scintillation Counter and results are presented as Disintegrations Per Minute (DPM)

Liquid Scintillation samples comprised a 20ml scintillation vial containing a known mass of radioactive compound dissolved in an appropriate solvent and 10ml of Prosafe Liquid Scintillation Cocktail containing:

- 60-75% Phenyl Xylyl Ethane
- 20-40% Alcohol Ethoxylate
- 2-8% Alcohol Ether Phosphate Ester
- 0.1-1.0% 2,5-Diphenyloxazole
- 0.1-1.0% 1,4-Bis(4-methyl-alpha-styryl)benzene

#### Gel Permeation Chromatography (GPC)

Analyses were conducted using THF as eluent. The GPC apparatus consisted of:

- Agilent 11100 Series RID
- 400C Eppendorf Oven
- Jasco PU 1580 Pump
- Jasco AS 590 Auto Samplers
- Polymer Laboratories PLgel 5  $\mu\text{m}$  mixed-C and PLgel 5  $\mu\text{m}$  mixed-D columns with a PL guard column

The eluent flow rate was 0.8 ml/min.

Calibration was conducted using poly(methyl methacrylate) standards with molecular weights ranging between 1000 and 1.5 million g/mol

### Radio TLC (R-TLC)

R-TLC analysis was conducted using an AR 2000 BIOSCAN Radio TLC Imaging Scanner utilising a gas filled proportional counter filled with 90/10 Argon/Methane to detect the beta radioactive emissions from thin layer chromatography (TLC) plates.

The TLC samples (1.0% w/w) were prepared in an appropriate solvent and eluted using Whatman TLC plates (Partisil LK6DF silica Gel 60A with FL indicator) with a silica thickness of 250µm and 3cm pre adsorbent zone

The plates were eluted using an appropriate solvent to a standard 15cm solvent front. After drying the plates were analysed

### UV-visible Spectrophotometry

Analysis was conducted using an Agilent 8453 UV-Visible Spectrophotometer comprising a photo diode array (PDA) for simultaneous measurement of the complete ultra violet light spectrum, with a wavelength range of 190-1100nm with a resolution of 2nm and < 0.03% stray light UV sample (0.025% w/v) was dissolved in 0.5ml ethanol.

### Cyclone Phosphor Analysis of the Filter, Photo Papers and Hair Swatches

Storage Phosphor Imaging was conducted using a Packard Biosciences Cyclone Phosphor Imaging System

Quantitative assessment using OptiQuant software requires the exposure of a series of standards during the measurement of unknown samples. Initial exposure times were maintained at 7 days to generate the latent image. Radioactive standards were purchased from American Radiolabelled Chemicals.

| Standard | Specific Activity (uCi/mg) | Radioactivity (DPM) |
|----------|----------------------------|---------------------|
| 1        | 0.000068                   | 75.5                |
| 2        | 0.000087                   | 97                  |
| 3        | 0.000130                   | 144                 |
| 4        | 0.000282                   | 313                 |
| 5        | 0.000530                   | 588                 |
| 6        | 0.000831                   | 922                 |
| 7        | 0.0011                     | 1221                |
| 8        | 0.00213                    | 2364                |
| 9        | 0.00358                    | 3974                |
| 10       | 0.00447                    | 4962                |
| 11       | 0.00898                    | 9968                |
| 12       | 0.0184                     | 20424               |
| 13       | 0.035                      | 38850               |
| 14       | 0.0516                     | 57276               |
| 14       | 0.117                      | 129870              |
| 15       | 0.22                       | 244200              |

### Oxidation of Substrate Samples

Substrates were weighed accurately prior to oxidation (continuous flow of oxygen) using a Canberra Packard Model 307 Sample Oxidiser prior to Liquid Scintillation Counting

### Synthetic Procedures

All synthetic procedures have been previously reported. Amounts of reagents, yields and radiochemical analysis are summarised below.

#### Methyl [<sup>14</sup>CH<sub>3</sub>]2-bromoisobutyrate

Methyl [<sup>14</sup>CH<sub>3</sub>] 2-bromoisobutyrate was synthesized using methyl [<sup>14</sup>CH<sub>3</sub>] alcohol (0.0055moles, 5.5 mCi), triethylamine (1.1eq) dimethylaminopyridine (0.013eq) and 2-bromoisobutyryl bromide (1.1eq). Chemical yield = 813.4mg (81%), Radiochemical yield 97%, Total activity = 5.135 mCi, Specific activity = 6.313µCi/mg, Chemical purity > 95%, Radiochemical purity = 98%

#### Benzyl [<sup>14</sup>CH<sub>2</sub>]2-bromoisobutyrate

Benzyl [<sup>14</sup>CH<sub>2</sub>]2-bromoisobutyrate was synthesized using benzyl [<sup>14</sup>CH<sub>2</sub>] alcohol (0.0203moles, 13.56 mCi), triethylamine (1.1eq) dimethylaminopyridine (0.013eq) and 2-bromoisobutyl bromide (1.1eq). Chemical yield = 4.5g (87%), Radiochemical yield = 97%, Total activity = 13.13 mCi, Specific activity = 3.015 µCi/mg, Chemical purity > 95%, Radiochemical purity = 96%

9-Hydroxyfluorenyl [<sup>14</sup>CH<sub>3</sub>] 2-bromoisobutyrate

9-Hydroxyfluorenyl [<sup>14</sup>CH<sub>3</sub>] 2-bromoisobutyrate was synthesized using 2-bromo [<sup>14</sup>CH<sub>3</sub>] isobutyric acid (0.00077 moles, 2 mCi), 9-hydroxyfluorene (1.1eq) and 1, 1'-carbonyldimidazole (1.1eq). Chemical yield = 65.4mg (26%), Radiochemical yield = 22%, Total activity = 447 μCi, Specific Activity = 6.834 μCi/mg, Chemical purity > 95%, Radiochemical purity = 99%.

**Figure S1:  $^1\text{H}$  NMR Spectra for Initiators**

A) Methyl [ $^{14}\text{C}$ ] $\text{CH}_3$  2-bromoisobutyrate

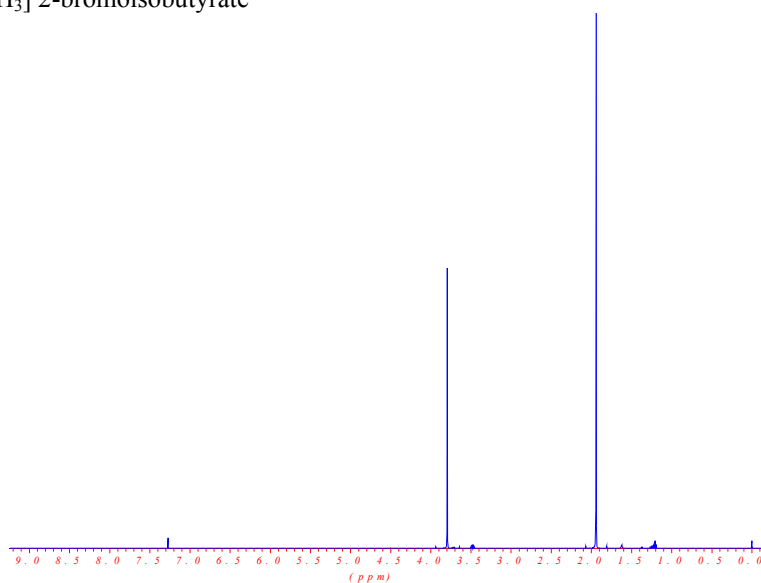

B) Benzyl [ $^{14}\text{C}$ ] $\text{CH}_2$  2-bromoisobutyrate

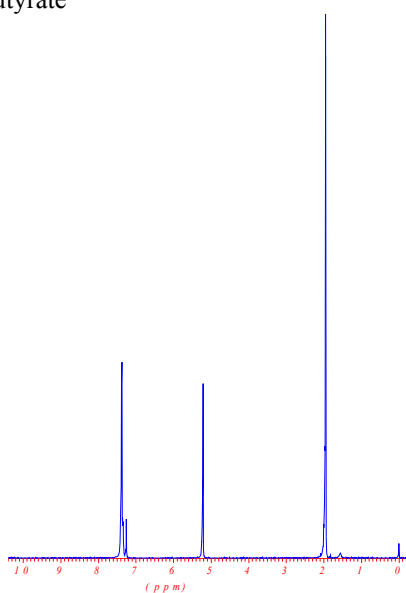

C) 9-Hydroxyfluorenyl [ $^{14}\text{C}$ ] $\text{CH}_3$  2-bromoisobutyrate

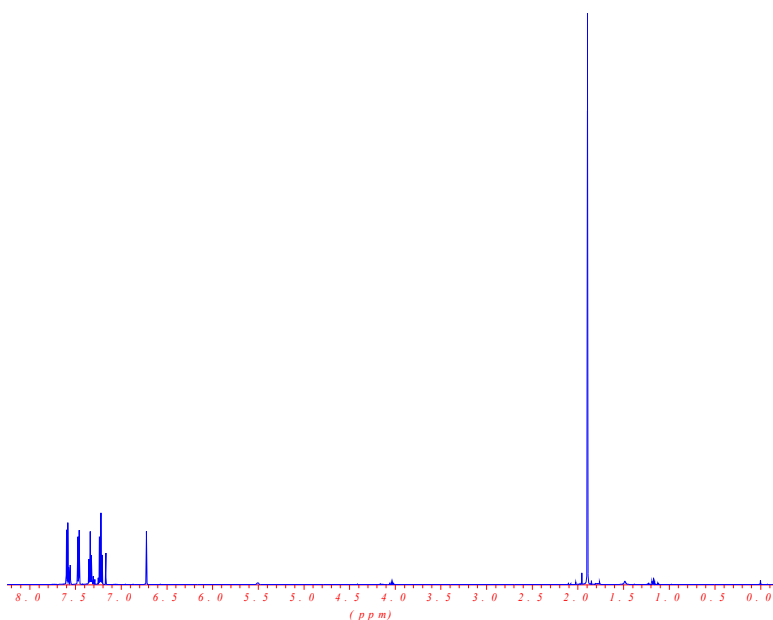

**Figure S2:  $^{13}\text{C}$  NMR Spectra of Initiators**

A) Methyl [ $^{14}\text{CH}_3$ ] 2-bromoisobutyrate

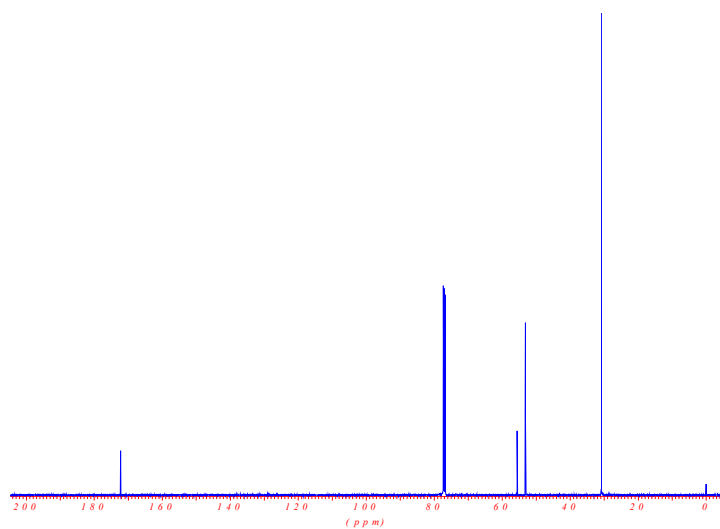

B) Benzyl [ $^{14}\text{CH}_2$ ] 2-bromoisobutyrate

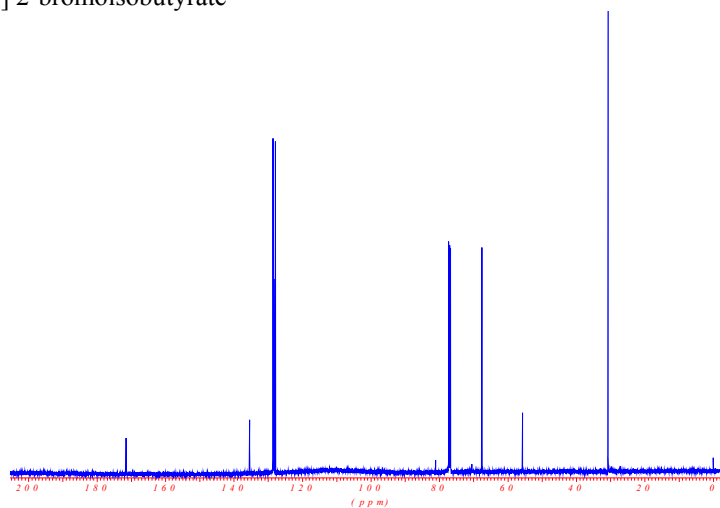

C) 9-Hydroxyflourenyl [ $^{14}\text{CH}_3$ ]2-bromoisobutyrate

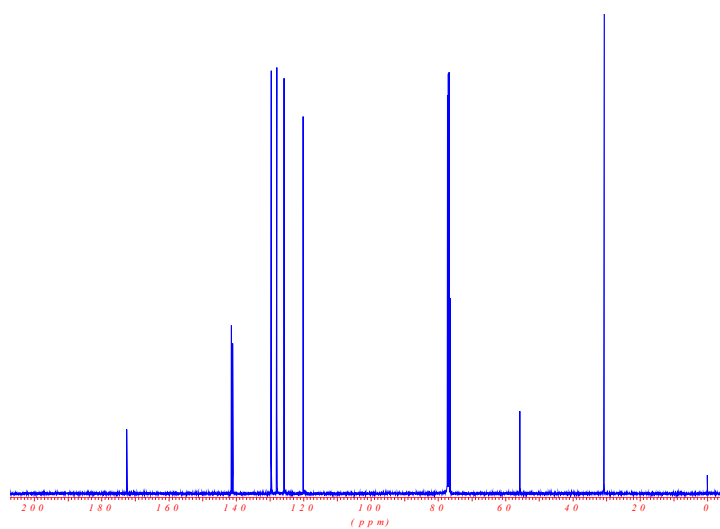

### Atom Transfer Radical Polymerisation (ATRP) of 2-(N,N-diethylamino) ethyl methacrylate (DEAEMA)

ATRP of DEAEMA using 2-propanol/water (90/10 v/v) followed previously reported procedures<sup>1,2</sup>

A typical GPC chromatogram for a degree of polymerisation equal to 50 monomer units is shown in Figure S3.

**Figure S3: GPC chromatogram of p(DEAEMA) with a target DP=50 monomer units using benzyl [<sup>14</sup>CH<sub>2</sub>] 2-bromoisobutyrate (DRI detector)**

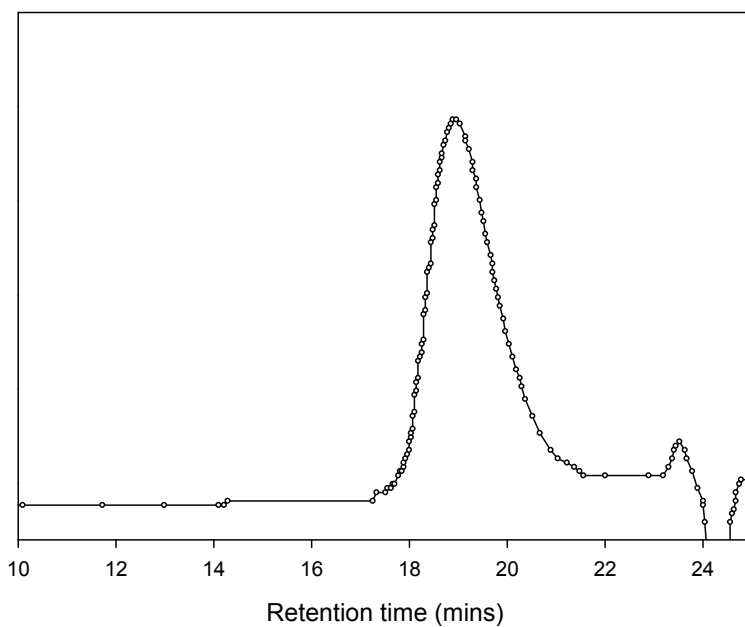

**Figure S4: Adsorption of radiolabeled poly(2-(N,N-diethylamino) ethyl methacrylate onto different substrates – Comparison within each chain end group. A) methyl (red), B) benzyl (green) and C) 9-hydroxyfluorenyl (blue) groups. Data shown is determined by oxidation and liquid scintillation counting for hair (triangles), filter paper (circles) and photographic paper (squares).**

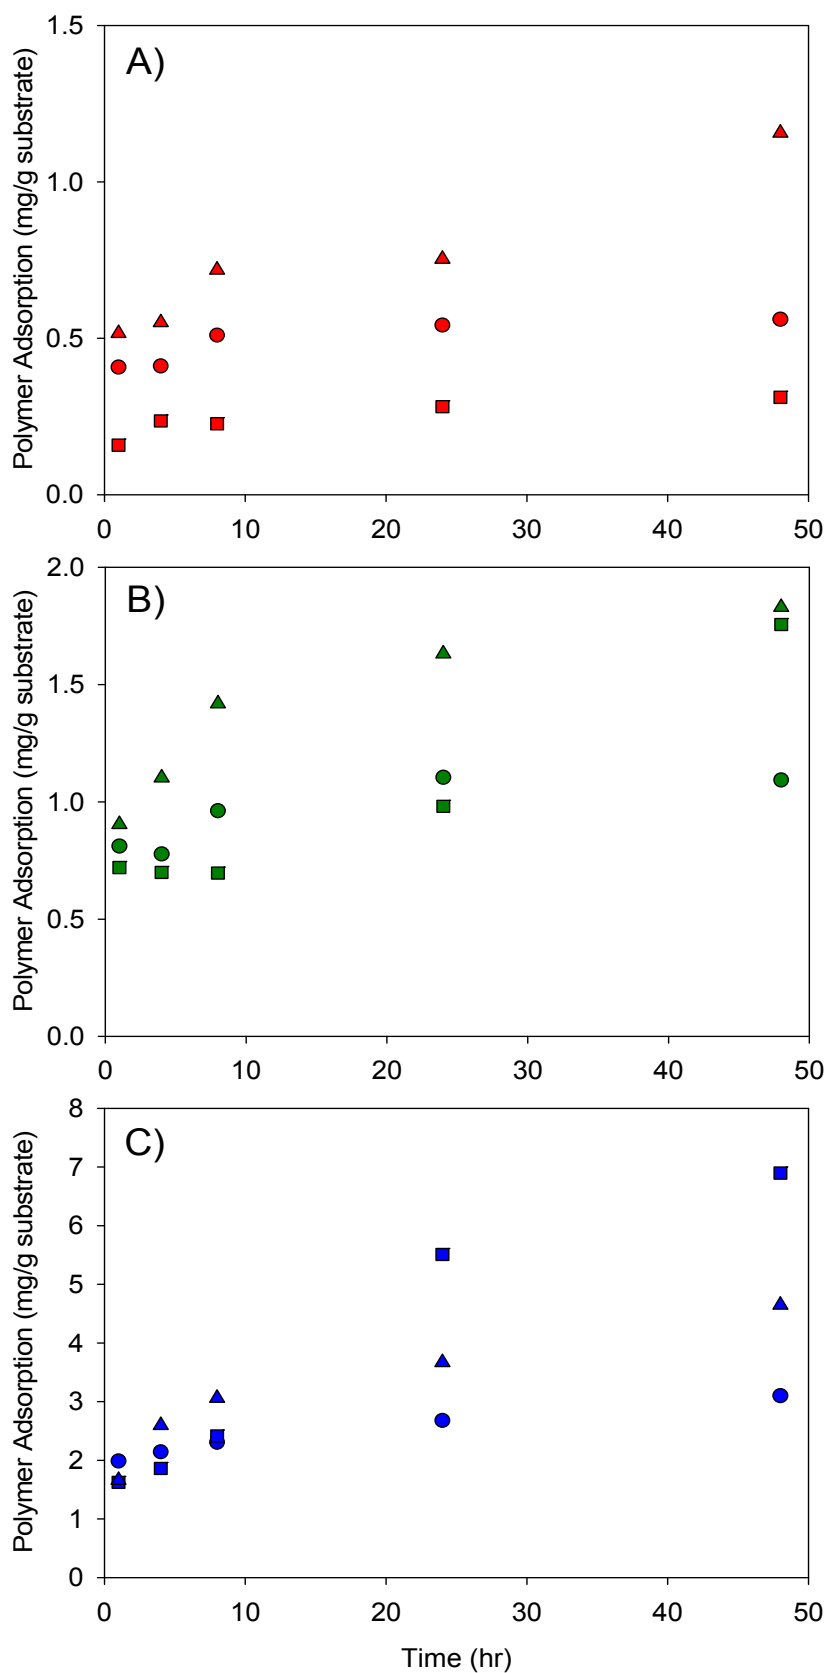

**Figure S5: Radio- TLC of p(DEAEMA) polymers to determine unreacted initiator content**  
Each polymer was eluted with 90/10 (v/v) 40:60 Petroleum Ether/Acetic Acid

A) p(DEAEMA) polymer derived from methyl [ $^{14}\text{C}$ ] 2-bromoisobutyrate

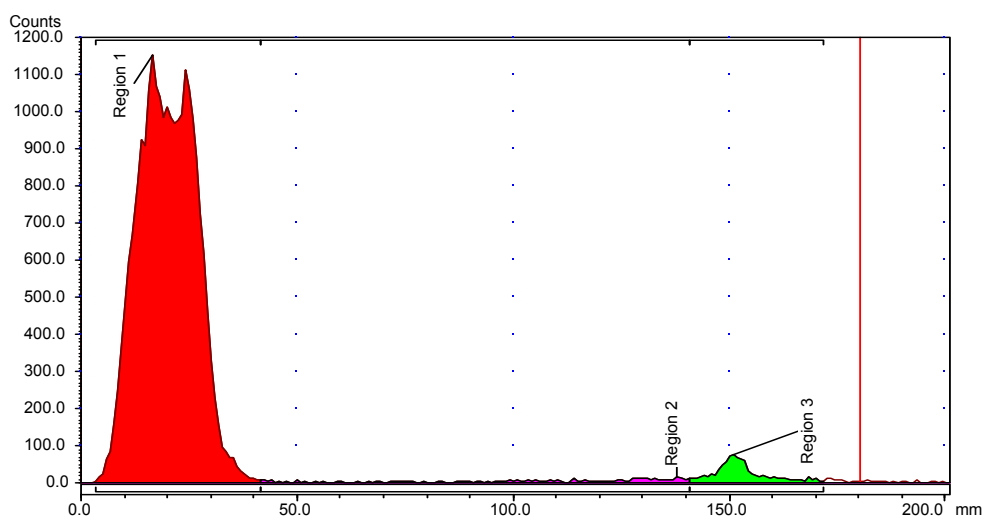

B) p(DEAEMA) polymer derived from benzyl [ $^{14}\text{C}$ ] 2-bromoisobutyrate

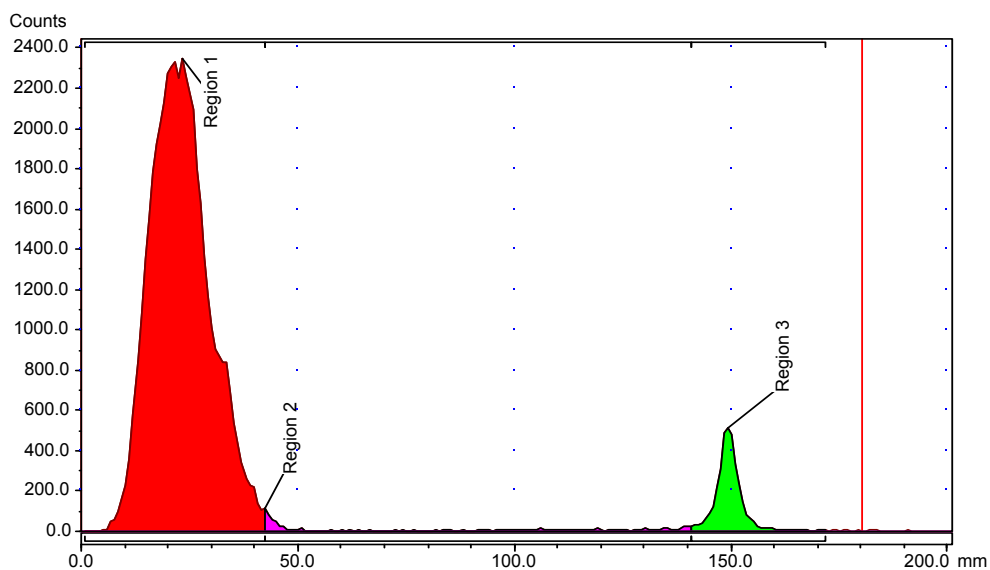

C) p(DEAEMA) polymer derived from 9-hydroxyfluorenyl [ $^{14}\text{C}$ ] 2-bromoisobutyrate

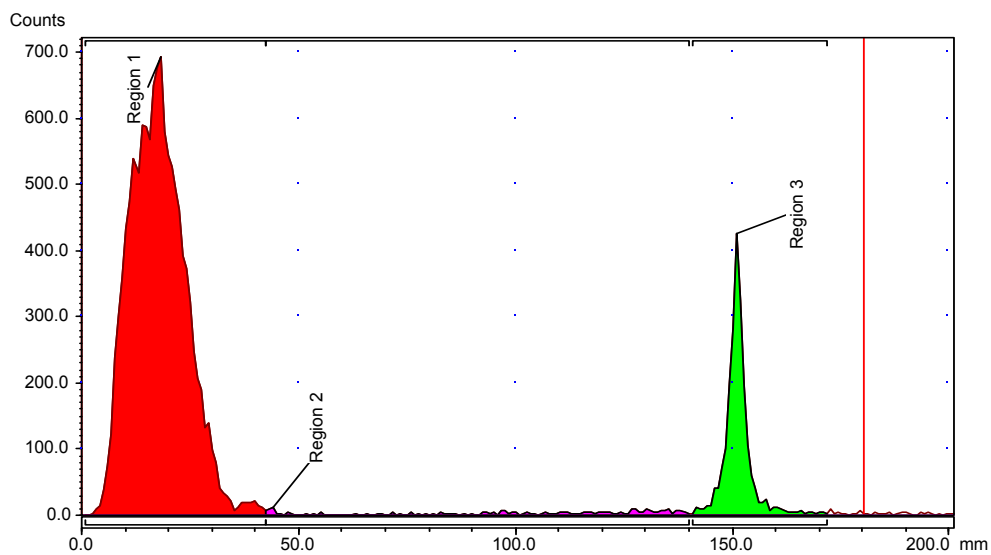



**Figure S6: Regression of Linear Region of Surface Tension Measurements**

A) p(DEAEMA) derived from methyl [<sup>14</sup>CH<sub>3</sub>] 2-bromoisobutyrate

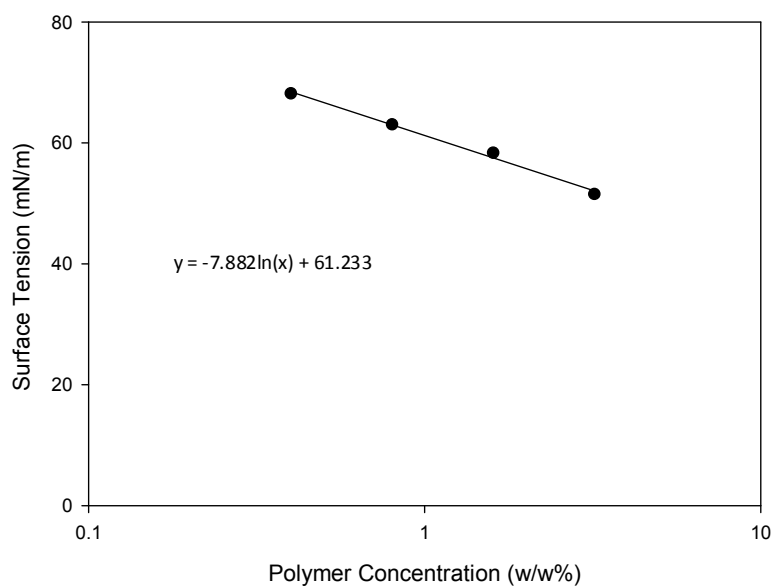

B) p(DEAEMA) derived from benzyl [<sup>14</sup>CH<sub>2</sub>] 2-bromoisobutyrate

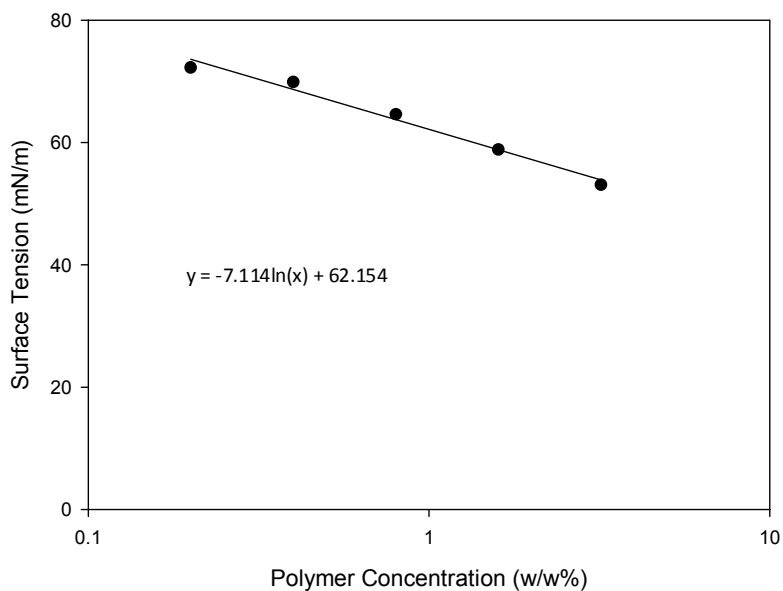

C) p(DEAEMA) derived from fluorenyl [<sup>14</sup>CH<sub>3</sub>] 2-bromoisobutyrate

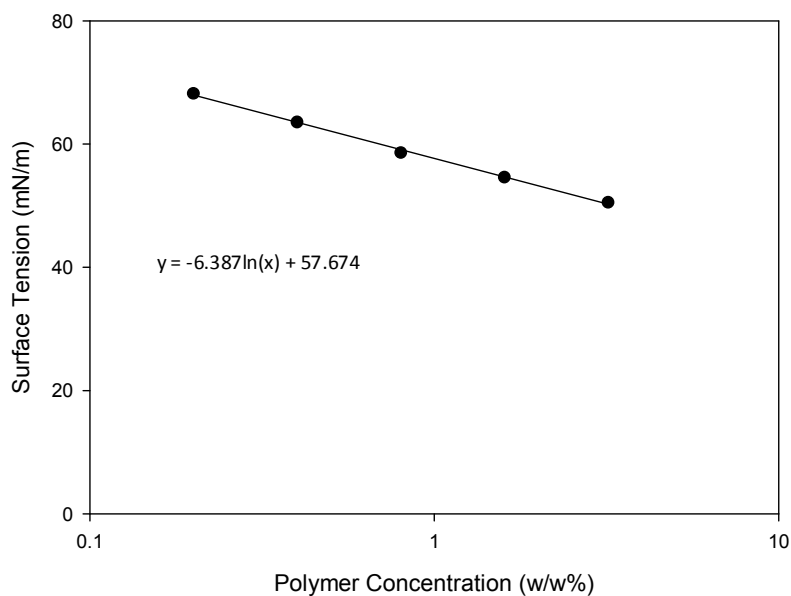

## References

- 1) S. McDonald and S. P. Rannard, *Macromolecules*, 2001, **34**, 8600. b) T. He, D. J. Adams, M. F. Butler, C. T. Yeoh, A. I. Cooper and S. P. Rannard, *Angew. Chem. Int. Ed.*, 2007, **46**, 9243. c) T. He, D. J. Adams, M. F. Butler, A. I. Cooper and S. P. Rannard, *J. Am. Chem. Soc.*, 2009, **131**, 1495.
- 2) a) M. Long, D. W. Thornthwaite, S. H. Rogers, G. Bonzi, F. R. Livens and S. P. Rannard, *Chem. Commun.*, 2009, **42**, 6406. b) M. Long, S. H. Rogers, D. W. Thornthwaite, F. R. Livens and S. P. Rannard *Polym. Chem.*, 2011, **2**, 581. c) S. Jana, S. P. Rannard and A. I. Cooper, *Chem. Commun.*, 2007, **28**, 2962.
